# Supplementary material
Source: PubMed Central journal article supplement (PMC3906808)

**Supplementary Table 1** Some organisms in the family *Beijerinckiaceae*, with a brief description of growth substrates utilized. Data are from: Dedysh *et al.* 2000; Dunfield *et al.*, 2003; Dedysh *et al.*, 2005; Kennedy, 2005; Vorobev *et al.*, 2009; Dedysh and Dunfield, 2010; Dunfield *et al.*, 2010; Vorobev *et al.*, 2011; Berestovskaya *et al.*, 2012.

| Organism                                                                           | Growth on CH <sub>4</sub> | Growth on CH <sub>3</sub> OH | Growth on substrates with C-C bonds                    | Description                         |
|------------------------------------------------------------------------------------|---------------------------|------------------------------|--------------------------------------------------------|-------------------------------------|
| <i>Methylocella</i> spp. ( <i>silvestris</i> , <i>palustris</i> , <i>tundrae</i> ) | +                         | +                            | acetate, ethanol, propane, pyruvate, succinate, malate | facultative methanotroph            |
| <i>Methylocapsa acidiphila</i>                                                     | +                         | +                            | -                                                      | obligate methanotroph               |
| <i>Beijerinckia indica</i>                                                         | -                         | -                            | many sugars, alcohols, organic acids                   | non-methylotrophic chemoorganotroph |
| <i>Beijerinckia mobilis</i>                                                        | -                         | +                            | many sugars, alcohols, organic acids                   | facultative methylotroph            |
| <i>Methyloferula stellata</i>                                                      | +                         | +                            | -                                                      | obligate methanotroph               |
| <i>Methylocapsa aurea</i>                                                          | +                         | +                            | acetate                                                | facultative methanotroph            |
| <i>Methylovirgula ligni</i>                                                        | -                         | +                            | many sugars, alcohols, organic acids                   | facultative methylotroph            |
| <i>Methylorosula polaris</i>                                                       | -                         | +                            | many sugars, alcohols, organic acids                   | facultative methylotroph            |

**Supplementary Table 2** 16S rRNA gene sequence identities of some species in the *Beijerinckiaceae*.

| Organism                       | <i>M. silvestris</i> | <i>M. acidiphila</i> | <i>B. indica</i> | <i>B. mobilis</i> | <i>M. aurea</i> | <i>M. stellata</i> |
|--------------------------------|----------------------|----------------------|------------------|-------------------|-----------------|--------------------|
| <i>Methylocella silvestris</i> |                      |                      |                  |                   |                 |                    |
| <i>Methylocapsa acidiphila</i> | 96.2                 |                      |                  |                   |                 |                    |
| <i>Beijerinckia indica</i>     | 97.2                 | 96.3                 |                  |                   |                 |                    |
| <i>Beijerinckia mobilis</i>    | 96.2                 | 96.7                 | 98.3             |                   |                 |                    |
| <i>Methylocapsa aurea</i>      | 97.3                 | 98.1                 | 97.5             | 97.5              |                 |                    |
| <i>Methyloferula stellata</i>  | 97.0                 | 96.5                 | 96.7             | 96.8              | 97.8            |                    |

**Supplementary Table 3** Methylotrophy genes assembled primarily from Chistoserdova *et al.* (2009), Vuilleumier *et al.* (2009), and Stein and Klotz (2011). The genes used to construct the phylogeny shown in Figure 5 are **in bold**. Presence of the genes in each of the three study genomes (Ms=*M. silvestris*; Mc=*M. acidiphila*; Bi=*B. indica*) is indicated. Positive detection of a homologue was based on annotations in JGI IMG, and on BLAST searches as described in the methods. A question mark indicates that there is a homologue (>30% identity) of uncertain function.

| gene symbol                                 | gene name                                                                       | Ms | Mc | Bi |
|---------------------------------------------|---------------------------------------------------------------------------------|----|----|----|
| <b>Methane oxidation</b>                    |                                                                                 |    |    |    |
| <i>pmoC</i>                                 | particulate methane monooxygenase (pMMO), subunit C                             | -  | +  | -  |
| <i>pmoB</i>                                 | particulate methane monooxygenase (pMMO), subunit B                             | -  | +  | -  |
| <i>pmoA</i>                                 | particulate methane monooxygenase (pMMO), subunit A                             | -  | +  | -  |
| <i>mmoX</i>                                 | soluble methane monooxygenase (sMMO), subunit alpha                             | +  | -  | -  |
| <i>mmoY</i>                                 | soluble methane monooxygenase (sMMO), subunit beta                              | +  | -  | -  |
| <i>mmoB</i>                                 | soluble methane monooxygenase (sMMO), regulatory component                      | +  | -  | -  |
| <i>mmoZ</i>                                 | soluble methane monooxygenase (sMMO), subunit gamma                             | +  | -  | -  |
| <b>Methanol oxidation</b>                   |                                                                                 |    |    |    |
| <b><i>mxoF</i></b>                          | <b>PQQ-dependent methanol dehydrogenase (MDH), large subunit</b>                | +  | +  | -  |
| <i>mxoJ</i>                                 | periplasmic protein, probable ABC transporter substrate-binding protein         | +  | +  | -  |
| <i>mxoG</i>                                 | periplasmic c-type cytochrome, primary electron acceptor from PQQ-dependent MDH | +  | +  | -  |
| <b><i>mxoI</i></b>                          | <b>PQQ-dependent methanol dehydrogenase (MDH), small subunit</b>                | +  | +  | -  |
| <i>mxoR</i>                                 | ATPase, P-loop NTPase family                                                    | +  | +  | -  |
| <i>mxoS</i>                                 | a von Willebrand factor type A (vWA) domain involved in methanol oxidation      | +  | +  | -  |
| <i>mxoA</i>                                 | essential for Ca <sup>2+</sup> insertion into MDH                               | +  | +  | -  |
| <i>mxoC</i>                                 | essential for Ca <sup>2+</sup> insertion into MDH                               | +  | +  | -  |
| <i>mxoK</i>                                 | essential for Ca <sup>2+</sup> insertion into MDH                               | +  | +  | -  |
| <i>mxoL</i>                                 | essential for Ca <sup>2+</sup> insertion into MDH                               | +  | +  | -  |
| <i>mxoD</i>                                 | essential for Ca <sup>2+</sup> insertion into MDH                               | +  | +  | -  |
| <i>mxoE</i>                                 | unknown                                                                         | +  | +  | -  |
| <i>mxoH</i>                                 | unknown                                                                         | +  | -  | -  |
| <i>mxoB</i>                                 | transcriptional regulator                                                       | -  | -  | -  |
| <i>mxoD</i>                                 | integral membrane sensor signal transduction histidine kinase                   | ?  | ?  | -  |
| <i>mxoM</i>                                 | response regulator                                                              | ?  | ?  | -  |
| <i>mxoQ</i>                                 | integral membrane sensor signal transduction histidine kinase                   | +  | +  | -  |
| <i>mxoE</i>                                 | response regulator                                                              | +  | +  | -  |
| <i>pqqA</i>                                 | coenzyme PQQ biosynthesis                                                       | +  | +  | -  |
| <b><i>pqqB</i></b>                          | <b>coenzyme PQQ biosynthesis</b>                                                | +  | +  | +  |
| <b><i>pqqC</i></b>                          | <b>coenzyme PQQ biosynthesis</b>                                                | +  | +  | +  |
| <b><i>pqqD</i></b>                          | <b>coenzyme PQQ biosynthesis</b>                                                | +  | +  | +  |
| <b><i>pqqE</i></b>                          | <b>coenzyme PQQ biosynthesis</b>                                                | +  | +  | +  |
| <i>pqqF</i>                                 | coenzyme PQQ biosynthesis                                                       | +  | +  | +  |
| <i>pqqG</i>                                 | coenzyme PQQ biosynthesis                                                       | +  | +  | +  |
| <i>xoxF</i>                                 | homolog of <i>mxoF</i>                                                          | +  | +  | +  |
| <b>Methylamine oxidation</b>                |                                                                                 |    |    |    |
| <i>mauF</i>                                 | methylamine oxidation protein                                                   | -  | -  | -  |
| <i>mauB</i>                                 | methylamine dehydrogenase, large subunit                                        | -  | -  | -  |
| <i>mauE</i>                                 | essential for small subunit maturation                                          | -  | -  | -  |
| <i>mauD</i>                                 | essential for small subunit maturation                                          | -  | -  | -  |
| <i>mauA</i>                                 | methylamine dehydrogenase, small subunit                                        | -  | -  | -  |
| <i>mauC</i>                                 | amicyanin                                                                       | -  | -  | -  |
| <i>mauJ</i>                                 | methylamine utilization protein                                                 | -  | -  | -  |
| <i>mauG</i>                                 | methylamine utilization protein                                                 | -  | -  | -  |
| <i>mauM</i>                                 | ferredoxin                                                                      | -  | -  | -  |
| <i>mauN</i>                                 | ferredoxin                                                                      | -  | -  | -  |
| <b>C1 transfer / formaldehyde oxidation</b> |                                                                                 |    |    |    |
| <b><i>fae</i></b>                           | <b>formaldehyde activating enzyme</b>                                           | +  | +  | -  |
| <b><i>mtdB</i></b>                          | <b>methylene-tetrahydromethanopterin (H<sub>4</sub>MPT) dehydrogenase</b>       | +  | +  | -  |

|                                                              |                                                                                           |   |   |   |
|--------------------------------------------------------------|-------------------------------------------------------------------------------------------|---|---|---|
| <b>fhcA</b>                                                  | <b>formyltransferase/hydrolase complex, alpha subunit</b>                                 | + | + | - |
| <b>fhcB</b>                                                  | <b>formyltransferase/hydrolase complex, beta subunit</b>                                  | + | + | - |
| <b>fhcC</b>                                                  | <b>formyltransferase/hydrolase complex, gamma subunit</b>                                 | + | + | - |
| <b>fhcD</b>                                                  | <b>formyltransferase/hydrolase complex, delta subunit</b>                                 | + | + | - |
| <i>orfY</i>                                                  | Unknown                                                                                   | + | + | - |
| <i>mtdA</i>                                                  | methylene-H <sub>4</sub> MPT /methylene-tetrahydrofolate (H <sub>4</sub> F) dehydrogenase | - | + | - |
| <i>fch</i>                                                   | methenyl-H <sub>4</sub> F cyclohydrolase                                                  | - | + | - |
| <i>dmrA</i>                                                  | dihydropyrimethanopterin reductase                                                        | + | - | - |
| <b>fflL</b>                                                  | <b>formyl-H<sub>4</sub>F ligase</b>                                                       | + | + | + |
| <i>folk</i>                                                  | 2-amino-4-hydroxy-6-hydroxymethyl-7,8-dihydropterin pyrophosphokinase                     | + | + | + |
| <i>folB</i>                                                  | dihydropyrimethanopterin aldolase                                                         | - | - | - |
| <i>folP</i>                                                  | dihydropyrimethanopterin synthase                                                         | + | + | + |
| <i>folE</i>                                                  | GTP cyclohydrolase                                                                        | + | + | + |
| <i>folC</i>                                                  | dihydrofolate synthase                                                                    | + | + | + |
| <i>orf5</i>                                                  | H <sub>4</sub> MPT biosynthesis                                                           | + | + | - |
| <i>orf7</i>                                                  | Unknown                                                                                   | + | + | - |
| <b>orf9</b>                                                  | <b>H<sub>4</sub>MPT biosynthesis</b>                                                      | + | + | - |
| <i>orf19</i>                                                 | H <sub>4</sub> MPT biosynthesis                                                           | + | + | - |
| <i>orf20</i>                                                 | H <sub>4</sub> MPT biosynthesis                                                           | + | + | - |
| <i>orf21</i>                                                 | H <sub>4</sub> MPT biosynthesis                                                           | + | + | - |
| <i>orf22</i>                                                 | H <sub>4</sub> MPT biosynthesis                                                           | + | + | - |
| <b>mch</b>                                                   | <b>methenyl-H<sub>4</sub>MPT cyclohydrolase</b>                                           | + | + | - |
| <i>dfrA</i>                                                  | dihydrofolate reductase                                                                   | + | + | + |
| <b>Formate oxidation</b>                                     |                                                                                           |   |   |   |
| <i>fdh1A</i>                                                 | tungsten-dependent formate dehydrogenase, alpha subunit                                   | - | + | - |
| <i>fdh1B</i>                                                 | tungsten-dependent formate dehydrogenase, beta subunit                                    | - | + | - |
| <i>fdh2A</i>                                                 | molybdenum-dependent formate dehydrogenase, alpha subunit                                 | + | + | + |
| <i>fdh2B</i>                                                 | molybdenum-dependent formate dehydrogenase, beta subunit                                  | + | + | + |
| <i>fdh2C</i>                                                 | molybdenum-dependent formate dehydrogenase, gamma subunit                                 | + | + | + |
| <i>fdh2D</i>                                                 | molybdenum-dependent formate dehydrogenase, delta subunit                                 | + | + | + |
| <i>fdh3A</i>                                                 | cytochrome-linked formate dehydrogenase, alpha subunit                                    | + | ? | ? |
| <i>fdh3B</i>                                                 | cytochrome-linked formate dehydrogenase, beta subunit                                     | + | - | - |
| <i>fdh3C</i>                                                 | cytochrome-linked formate dehydrogenase, gamma subunit                                    | + | - | - |
| <b>C1-assimilation: serine cycle</b>                         |                                                                                           |   |   |   |
| <b>sga</b>                                                   | <b>serine-glyoxylate aminotransferase</b>                                                 | + | + | + |
| <b>hpr</b>                                                   | <b>hydroxypyruvate reductase</b>                                                          | + | + | + |
| <b>gck</b>                                                   | <b>glycerate kinase</b>                                                                   | + | + | + |
| <i>eno</i>                                                   | enolase                                                                                   | + | + | + |
| <b>ppcA</b>                                                  | <b>phosphoenolpyruvate carboxylase</b>                                                    | + | + | + |
| <i>mdh</i>                                                   | malate dehydrogenase                                                                      | + | + | + |
| <b>mtkA</b>                                                  | <b>malate thiokinase, alpha subunit</b>                                                   | + | + | ? |
| <b>mtkB</b>                                                  | <b>malate thiokinase, beta subunit</b>                                                    | + | + | ? |
| <b>mcl</b>                                                   | <b>malyl-CoA lyase</b>                                                                    | + | + | ? |
| <i>glyA</i>                                                  | serine hydroxymethyltransferase                                                           | + | + | + |
| <i>qscR</i>                                                  | serine cycle transcriptional regulator                                                    | + | - | - |
| <b>C1-assimilation: EMC pathway, glyoxylate regeneration</b> |                                                                                           |   |   |   |
| <i>phaA</i>                                                  | alpha-ketothiolase                                                                        | + | + | + |
| <i>phaB</i>                                                  | acetoacetyl-CoA reductase                                                                 | + | + | + |
| <i>phaC</i>                                                  | poly-beta-hydroxybutyrate polymerase                                                      | + | + | + |
| <i>phaR</i>                                                  | regulator of PHB synthesis and acetyl-CoA flux                                            | + | + | + |
| <i>phaZ</i>                                                  | polyhydroxyalkanoate depolymerase                                                         | + | + | + |
| <i>icl</i>                                                   | isocitrate lyase                                                                          | + | + | + |
| <i>croR</i>                                                  | crotonase                                                                                 | - | - | - |
| <i>ccr</i>                                                   | crotonyl-CoA reductase                                                                    | - | - | - |
| <i>meaB</i>                                                  | essential for methylmalonyl-CoA mutase reaction                                           | - | - | - |
| <i>meaC</i>                                                  | mesaconyl-CoA hydratase                                                                   | - | - | - |
| <i>ibd</i>                                                   | methylsuccinyl-CoA dehydrogenase                                                          | - | - | - |
| <i>mclA2</i>                                                 | malyl-CoA lyase/beta-methylmalyl-CoA lyase                                                | - | - | - |
| <i>ecm</i>                                                   | ethylmalonyl-CoA mutase                                                                   | - | - | - |
| <i>pccA</i>                                                  | propionyl-CoA carboxylase, alpha subunit                                                  | + | + | + |
| <i>pccB</i>                                                  | propionyl-CoA carboxylase, beta subunit                                                   | + | + | + |
| <i>mcmA</i>                                                  | methylmalonyl-CoA mutase, alpha subunit                                                   | + | + | + |

|                            |                                                             |   |   |   |
|----------------------------|-------------------------------------------------------------|---|---|---|
| <i>mcmB</i>                | methylmalonyl-CoA mutase, beta subunit                      | + | + | + |
| <i>epm</i>                 | methylmalonyl-CoA epimerase                                 | + | + | + |
| <i>bdhA</i>                | 3-hydroxybutyrate dehydrogenase                             | + | + | + |
| <i>aad</i>                 | acetoacetate decarboxylase                                  | + | + | + |
| <i>aas</i>                 | acetoacetyl-CoA synthetase                                  | + | + | + |
| <i>sdhA</i>                | succinate dehydrogenase flavoprotein subunit                | + | + | + |
| <i>sdhB</i>                | succinate dehydrogenase iron-sulfur binding subunit         | + | + | + |
| <i>sdhC</i>                | succinate dehydrogenase cytochrome B556 subunit             | + | + | + |
| <i>sdhD</i>                | succinate dehydrogenase membrane anchor subunit             | + | + | + |
| <i>fumC</i>                | fumarate hydratase                                          | + | + | + |
| <b>Nitrogen Metabolism</b> |                                                             |   |   |   |
| <i>haoA</i>                | hydroxylamine dehydrogenase                                 | - | - | - |
| <i>nirK</i>                | nitrite reductase, copper-containing                        | + | - | - |
| <i>nirS</i>                | cytochrome cd1 nitrite reductase                            | - | - | - |
| <i>cytL</i>                | cytochrome P460, nitric oxide : hydroxylamine dehydrogenase | + | - | - |
| <i>cytS</i>                | putative nitric oxide reductase                             | - | - | - |
| <i>norB</i>                | nitric oxide reductase, heme-copper oxidase subunit I       | + | - | - |

**Supplementary Table 4** Amount of genes in some different COG categories in the three genomes, along with the proportions of putative laterally transferred genes in each calculated by a BLAST procedure at the taxonomic level of Order (from IMG) or Family. An asterisk indicates that the proportion of genes in a COG, or the proportion of predicted LGT in that COG, is significantly higher in *M. silvestris* or *B. indica* than in *M. acidiphila*, calculated with a Z-ratio test of proportions and a Bonferroni correction for three comparisons.

| Organism                    | All protein-coding genes <sup>a</sup> | Carbohydrate transport and metabolism (G) | Energy production and conversion (C) | Signal transduction mechanisms (T) | Inorganic ion transport and metabolism (P) | Cell wall/ envelope/ membrane biogenesis (M) | Transcription (K) | Average other COGs <sup>b</sup> |
|-----------------------------|---------------------------------------|-------------------------------------------|--------------------------------------|------------------------------------|--------------------------------------------|----------------------------------------------|-------------------|---------------------------------|
| <b><i>M. silvestris</i></b> |                                       |                                           |                                      |                                    |                                            |                                              |                   |                                 |
| Total genes                 | 3917                                  | 129                                       | 251                                  | 154                                | 213                                        | 183                                          | 188               | 1646                            |
| % LGT Order level           | <b>12.2*</b>                          | 7.8                                       | 8.8                                  | 7.1                                | 11.7                                       | 4.3                                          | 13.8              | 6.6                             |
| % LGT Family level          |                                       | <b>27.2*</b>                              | <b>36.4*</b>                         | 34.2                               | <b>34.4*</b>                               | 15.4                                         | 38.9              |                                 |
| <b><i>M. acidiphila</i></b> |                                       |                                           |                                      |                                    |                                            |                                              |                   |                                 |
| Total genes                 | 3700                                  | 98                                        | 208                                  | 130                                | 165                                        | 198                                          | 171               | 1688                            |
| % LGT Order level           | 7.75                                  | 7.1                                       | 3.4                                  | 4.6                                | 6.7                                        | 10.1                                         | 10.5              | 6.2                             |
| % LGT Family level          |                                       | 13.6                                      | 20.3                                 | 23.8                               | 22.4                                       | 21.3                                         | 28.3              |                                 |
| <b><i>B. indica</i></b>     |                                       |                                           |                                      |                                    |                                            |                                              |                   |                                 |
| Total genes                 | 3788                                  | <b>203*</b>                               | 259                                  | 127                                | 199                                        | 199                                          | <b>226*</b>       | 1593                            |
| % LGT Order level           | <b>17.8*</b>                          | <b>20.2*</b>                              | <b>18.5*</b>                         | <b>16.5*</b>                       | <b>16.1*</b>                               | 17.6                                         | <b>23.9*</b>      | <b>9.2*</b>                     |
| % LGT Family level          |                                       | <b>59.3*</b>                              | <b>42.2*</b>                         | 34.9                               | <b>37.0*</b>                               | <b>36.5*</b>                                 | <b>55.2*</b>      |                                 |

<sup>a</sup> The numbers in individual COG categories do not sum to the total because not all the LGT genes are classified into COGs. Numbers do not include non-coding reference genes.

<sup>b</sup> Comprises the 13 COG groups: Amino acid transport and metabolism (E); Coenzyme transport and metabolism (H); Cell cycle control, cell division, chromosome partitioning (D); Cell motility (N); Defense mechanisms (V); Function unknown (S); Intracellular trafficking, secretion, and vesicular transport; Lipid transport and metabolism (U); Nucleotide transport and metabolism (F); Posttranslational modification, protein turnover, chaperones (O); Replication, recombination and repair (L); Secondary metabolites biosynthesis, transport and catabolism (Q); and Translation, ribosomal structure and biogenesis (J).

**Supplementary Table 5** Taxonomic distribution of the top BLAST hits of genes from Table 3 and Supplementary Table 4 that are predicted to be acquired via LGT.

| Organism                                            | Total predicted genes via LGT | other Rhizobiales | Rhodospirillales | Rhodobacteriales | Caulobacteriales | Sphingomonadales | Deltaproteobacteria | Betaproteobacteria (Burkholderiales) | Gammaproteobacteria | Firmicutes | Acidobacteria | Cyanobacteria | Thermus | Thermotoga |
|-----------------------------------------------------|-------------------------------|-------------------|------------------|------------------|------------------|------------------|---------------------|--------------------------------------|---------------------|------------|---------------|---------------|---------|------------|
| <b>Transporters</b>                                 |                               |                   |                  |                  |                  |                  |                     |                                      |                     |            |               |               |         |            |
| <i>M. silvestris</i>                                | 15                            | 10                | 2                | 0                | 0                | 0                | 0                   | 2                                    | 0                   | 1          | 0             | 0             | 0       | 0          |
| <i>M. acidiphila</i>                                | 4                             | 1                 | 1                | 0                | 0                | 0                | 0                   | 0                                    | 1                   | 0          | 0             | 0             | 1       | 0          |
| <i>B. indica</i>                                    | 43                            | 11                | 13               | 0                | 0                | 3                | 3                   | 10                                   | 1                   | 0          | 0             | 0             | 0       | 1          |
| <b>COG G: Carbohydrate transport and metabolism</b> |                               |                   |                  |                  |                  |                  |                     |                                      |                     |            |               |               |         |            |
| <i>M. silvestris</i>                                | 33                            | 20                | 1                | 1                | 1                | 0                | 0                   | 3                                    | 1                   | 1          | 2             | 0             | 0       | 0          |
| <i>M. acidiphila</i>                                | 13                            | 5                 | 3                | 0                | 0                | 0                | 0                   | 1                                    | 1                   | 1          | 1             | 0             | 1       | 0          |
| <i>B. indica</i>                                    | 111                           | 57                | 20               | 0                | 2                | 2                | 0                   | 14                                   | 7                   | 0          | 0             | 0             | 0       | 1          |
| <b>COG K: Transcription</b>                         |                               |                   |                  |                  |                  |                  |                     |                                      |                     |            |               |               |         |            |
| <i>M. silvestris</i>                                | 72                            | 38                | 14               | 0                | 2                | 1                | 0                   | 5                                    | 6                   | 0          | 1             | 2             | 0       | 0          |
| <i>M. acidiphila</i>                                | 47                            | 16                | 7                | 2                | 2                | 2                | 6                   | 3                                    | 4                   | 0          | 1             | 1             | 0       | 0          |
| <i>B. indica</i>                                    | 122                           | 59                | 23               | 2                | 3                | 7                | 0                   | 17                                   | 6                   | 0          | 0             | 2             | 0       | 0          |

**Supplementary Table 6** A section of the *B. indica* plasmid NC\_010580 containing genes for Carbohydrate transport and metabolism (COG G), Amino acid transport and metabolism (COG E) and Energy production and conversion (COG C).

| Locus Tag | gene description                                                     | COG category | detected as foreign via IMG BLAST |
|-----------|----------------------------------------------------------------------|--------------|-----------------------------------|
| Bind_3793 | extracellular solute-binding protein family 1                        | G            |                                   |
| Bind_3794 | binding-protein-dependent transport systems inner membrane component | G            |                                   |
| Bind_3795 | binding-protein-dependent transport systems inner membrane component | G            |                                   |
| Bind_3796 | ABC transporter related                                              | G            |                                   |
| Bind_3797 | Mannitol dehydrogenase domain (EC:1.1.1.67)                          | G            |                                   |
| Bind_3800 | sorbitol dehydrogenase small subunit (EC:1.1.99.21)                  | -            | x                                 |
| Bind_3801 | glucose-methanol-choline oxidoreductase                              | E            | x                                 |
| Bind_3802 | Gluconate 2-dehydrogenase (acceptor)                                 | C            | x                                 |
| Bind_3803 | putative insertion sequence transposase-like protein                 | L            |                                   |
| Bind_3804 | hypothetical protein                                                 | -            |                                   |
| Bind_3805 | transketolase (EC:2.2.1.1)                                           | G            |                                   |
| Bind_3806 | transaldolase (EC:2.2.1.2)                                           | G            |                                   |
| Bind_3807 | xylulokinase (EC:2.7.1.17)                                           | G            |                                   |
| Bind_3808 | transcriptional regulator, AraC family                               | K            |                                   |
| Bind_3809 | hypothetical protein                                                 | -            | x                                 |
| Bind_3810 | Alcohol dehydrogenase GroES domain protein (EC:1.1.1.9)              | E            |                                   |
| Bind_3811 | periplasmic binding protein/LacI transcriptional regulator           | G            |                                   |

**Supplementary Table 7** The total amount of LGT in the three genomes predicted by different methods. The letters indicate significant differences among the three genomes in the proportion of LGT at  $P=0.05$ , calculated with a Z-ratio test of proportions and a Bonferroni correction for three comparisons.

| Organism             | ORFs | LGT genes predicted via BLAST at the order level | LGT genes predicted by Alien Hunter | LGT genes predicted by IslandViewer |
|----------------------|------|--------------------------------------------------|-------------------------------------|-------------------------------------|
| <i>M. silvestris</i> | 3917 | 481 <sup>A</sup>                                 | 545 <sup>A</sup>                    | 209 <sup>A</sup>                    |
| <i>M. acidiphila</i> | 3700 | 287 <sup>B</sup>                                 | 660 <sup>B</sup>                    | 179 <sup>A</sup>                    |
| <i>B. indica</i>     | 3788 | 678 <sup>C</sup>                                 | 641 <sup>B</sup>                    | 165 <sup>A</sup>                    |

**Supplementary Table 8** COG distributions of the genes predicted in islands identified by IslandViewer. Most genes were hypothetical and not assigned to any COG category. The letters indicate significant differences among the three genomes for genes in each COG category at  $P=0.05$ , calculated with a Z-ratio test of proportions and a Bonferroni correction for three comparisons.

| Organism             | All genes in Islands | Carbohydrate transport and metabolism (G) | Energy production and conversion (C) | Signal transduction mechanisms (T) | Inorganic ion transport and metabolism (P) | Cell wall/ envelope/ membrane biogenesis (M) | Transcription (K) |
|----------------------|----------------------|-------------------------------------------|--------------------------------------|------------------------------------|--------------------------------------------|----------------------------------------------|-------------------|
| <i>M. silvestris</i> | 209                  | 4 <sup>AB</sup>                           | 10 <sup>A</sup>                      | 0 <sup>A</sup>                     | 3 <sup>A</sup>                             | 0 <sup>A</sup>                               | 6 <sup>A</sup>    |
| <i>M. acidiphila</i> | 179                  | 0 <sup>A</sup>                            | 0 <sup>B</sup>                       | 2 <sup>A</sup>                     | 1 <sup>A</sup>                             | 10 <sup>B</sup>                              | 15 <sup>AB</sup>  |
| <i>B. indica</i>     | 165                  | 9 <sup>B</sup>                            | 8 <sup>A</sup>                       | 3 <sup>A</sup>                     | 3 <sup>A</sup>                             | 7 <sup>B</sup>                               | 20 <sup>B</sup>   |



**Supplementary Table 9** Some potential islands of LGT in the *B. indica* genome, identified as a set of contiguous genes all predicted as foreign by at least one method. Islands predicted primarily by AlienHunter alone are not shown because of the imprecision of this method in targeting individual genes. An x indicates a putative foreign gene. COG categories G, C, T, P, M and K, where most LGT in *B. indica* are evident, are in bold (See Figure 2). For genes without an assigned COG, or assigned to COG R (general function prediction only) KOGs are also given in parentheses where identified.

| Locus Tag        | gene                                                                 | COG category    | IMG BLAST | IslandViewer | AlienHunter |
|------------------|----------------------------------------------------------------------|-----------------|-----------|--------------|-------------|
| <b>Bind_0087</b> | <b>glycosyltransferase sugar-binding region containing DXD motif</b> | <b>M</b>        | x         |              | x           |
| Bind_0088        | glycosyl transferase family 2                                        | -               |           |              | x           |
| <b>Bind_0089</b> | <b>NADH:flavin oxidoreductase/NADH oxidase</b>                       | <b>C</b>        | x         |              |             |
| <b>Bind_0090</b> | <b>NAD-dependent epimerase/dehydratase</b>                           | <b>G</b>        | x         |              |             |
| Bind_0503        | 4Fe-4S ferredoxin, iron-sulfur binding                               | -               | x         |              |             |
| <b>Bind_0504</b> | <b>cyclic nucleotide-binding protein</b>                             | <b>T</b>        | x         |              |             |
| <b>Bind_0505</b> | <b>oxidoreductase FAD/NAD(P)-binding domain protein</b>              | <b>C</b>        | x         |              |             |
| <b>Bind_0506</b> | <b>NADH ubiquinone oxidoreductase 20 kDa subunit</b>                 | <b>C</b>        | x         |              |             |
| <b>Bind_0507</b> | <b>nickel-dependent hydrogenase large subunit</b>                    | <b>C</b>        | x         |              |             |
| <b>Bind_0508</b> | <b>hydrogenase maturation protease</b>                               | <b>C</b>        | x         |              |             |
| <b>Bind_0619</b> | <b>transcriptional regulator, LysR family</b>                        | <b>K</b>        | x         |              | x           |
| <b>Bind_0620</b> | <b>short-chain dehydrogenase/reductase SDR( EC:1.1.1.69 )</b>        | <b>I</b>        |           |              | x           |
| Bind_0621        | hypothetical protein                                                 | -               | x         |              | x           |
| <b>Bind_0622</b> | <b>D-isomer specific 2-hydroxyacid dehydrogenase NAD-binding</b>     | <b>C</b>        | x         |              | x           |
| Bind_0623        | putative 2-keto-4-pentenoate hydratase-like protein                  | Q               | x         |              | x           |
| <b>Bind_0624</b> | <b>transcriptional regulator, LacI family</b>                        | <b>K</b>        |           |              | x           |
| <b>Bind_0625</b> | <b>carbohydrate kinase, thermoresistant glucokinase family</b>       | <b>G</b>        | x         |              | x           |
| <b>Bind_0626</b> | <b>oxidoreductase domain protein</b>                                 | <b>R (G, Q)</b> | x         |              | x           |
| <b>Bind_0627</b> | <b>major facilitator superfamily MFS_1</b>                           | <b>G</b>        | x         |              | x           |
| <b>Bind_0791</b> | <b>transcriptional regulator, LysR family</b>                        | <b>K</b>        | x         |              |             |
| <b>Bind_0792</b> | <b>NAD-dependent epimerase/dehydratase</b>                           | <b>G</b>        | x         |              |             |
| Bind_0793        | hypothetical protein                                                 | -               | x         |              |             |
| Bind_0838        | glycosyl transferase family 2                                        | R               | x         |              |             |
| <b>Bind_0839</b> | <b>glycosyl transferase group 1</b>                                  | <b>M</b>        | x         |              |             |
| <b>Bind_0840</b> | <b>glycosyl transferase group 1</b>                                  | <b>M</b>        | x         |              |             |
| <b>Bind_0841</b> | <b>glycosyl transferase group 1</b>                                  | <b>M</b>        | x         |              |             |
| Bind_0842        | hypothetical protein                                                 | -               | x         |              | x           |
| Bind_0843        | hypothetical protein                                                 | -               |           |              | x           |
| <b>Bind_0844</b> | <b>glycosyl transferase family 2</b>                                 | <b>R</b>        | x         |              | x           |
| Bind_1824        | Glutathione S-transferase domain                                     | O               | x         |              | x           |
| Bind_1825        | short-chain dehydrogenase/reductase                                  | R (Q)           |           |              | x           |
| Bind_1826        | alpha/beta hydrolase fold                                            | R (I)           | x         |              | x           |
| <b>Bind_1827</b> | <b>transcriptional regulator, MarR family</b>                        | <b>K</b>        | x         | x            | x           |
| <b>Bind_1828</b> | <b>NmrA family protein</b>                                           | <b>G</b>        |           | x            | x           |
| <b>Bind_1829</b> | <b>transcriptional regulator, AraC family</b>                        | <b>K</b>        | x         | x            | x           |
| Bind_1830        | short-chain dehydrogenase/reductase SDR                              | R (Q)           | x         | x            | x           |
| Bind_1832        | protein of unknown function                                          | S               |           | x            | x           |
| <b>Bind_1833</b> | <b>transcriptional regulator, LysR family</b>                        | <b>K</b>        | x         | x            | x           |

|                  |                                                                                                    |                 |          |          |
|------------------|----------------------------------------------------------------------------------------------------|-----------------|----------|----------|
| <b>Bind_1834</b> | <b>NADH:flavin oxidoreductase/NADH oxidase</b>                                                     | <b>C</b>        | <b>x</b> | <b>x</b> |
| <b>Bind_1835</b> | <b>Alcohol dehydrogenase zinc-binding domain protein</b>                                           | <b>C</b>        | <b>x</b> | <b>x</b> |
| Bind_1881        | Isoprenylcysteine carboxyl methyltransferase                                                       | O               | x        |          |
| <b>Bind_1882</b> | <b>multi-sensor signal transduction histidine kinase</b>                                           | <b>T</b>        | <b>x</b> |          |
| <b>Bind_1883</b> | <b>response regulator receiver protein</b>                                                         | <b>T</b>        | <b>x</b> |          |
| <b>Bind_1884</b> | <b>response regulator receiver sensor signal transduction histidine kinase</b>                     | <b>T</b>        | <b>x</b> |          |
| Bind_1932        | flavoprotein WrbA                                                                                  | R (R)           | x        |          |
| Bind_1933        | Ycel family protein                                                                                | S               | x        |          |
| <b>Bind_1934</b> | <b>cytochrome B561</b>                                                                             | <b>C</b>        | <b>x</b> |          |
| Bind_1935        | Ycel family protein                                                                                | S               | x        |          |
| Bind_1937        | Pirin domain protein                                                                               | R               | x        |          |
| Bind_1966        | molybdopterin-guanine dinucleotide biosynthesis protein B                                          | H               | x        |          |
| <b>Bind_1967</b> | <b>ABC-type nitrate/sulfonate/bicarbonate transport systems periplasmic component-like protein</b> | <b>P</b>        | <b>x</b> |          |
| <b>Bind_1968</b> | <b>response regulator receiver and ANTAR domain protein</b>                                        | <b>T</b>        | <b>x</b> |          |
| <b>Bind_1969</b> | <b>molybdopterin oxidoreductase (EC:1.8.1.2)</b>                                                   | <b>R, P (C)</b> | <b>x</b> |          |
| <b>Bind_1970</b> | <b>nitrite reductase (NAD(P)H), large subunit (EC:1.7.1.4)</b>                                     | <b>C</b>        | <b>x</b> |          |
| <b>Bind_1971</b> | <b>major facilitator superfamily MFS_1</b>                                                         | <b>P</b>        | <b>x</b> |          |
| <b>Bind_2004</b> | <b>putative ABC-type Fe<sup>3+</sup> transport system periplasmic component</b>                    | <b>P</b>        | <b>x</b> | <b>x</b> |
| <b>Bind_2005</b> | <b>transport system permease protein</b>                                                           | <b>P</b>        | <b>x</b> |          |
| Bind_2006        | ABC transporter related                                                                            | H               | x        |          |
| Bind_2015        | polysaccharide biosynthesis protein                                                                | R (-)           | x        | x        |
| <b>Bind_2016</b> | <b>FAD linked oxidase domain protein</b>                                                           | <b>C</b>        |          | <b>x</b> |
| <b>Bind_2017</b> | <b>Cyclopropane-fatty-acyl-phospholipid synthase</b>                                               | <b>M</b>        |          | <b>x</b> |
| Bind_2018        | 4-oxalocrotonate tautomerase                                                                       | -               |          | x        |
| <b>Bind_2019</b> | <b>Mn<sup>2+</sup>/Fe<sup>2+</sup> transporter, NRAMP family</b>                                   | <b>P</b>        |          | <b>x</b> |
| <b>Bind_2020</b> | <b>Levanase</b>                                                                                    | <b>G</b>        | <b>x</b> | <b>x</b> |
| Bind_2021        | Levansucrase                                                                                       | -               | x        |          |
| Bind_2150        | hypothetical protein                                                                               | -               | x        | x        |
| <b>Bind_2151</b> | <b>outer membrane efflux protein</b>                                                               | <b>M</b>        | <b>x</b> | <b>x</b> |
| <b>Bind_2152</b> | <b>efflux transporter, RND family, MFP subunit</b>                                                 | <b>M</b>        | <b>x</b> |          |
| <b>Bind_2153</b> | <b>heavy metal efflux pump, CzcA family</b>                                                        | <b>P</b>        | <b>x</b> |          |
| Bind_2498        | flavin reductase domain protein, FMN-binding                                                       | R (-)           | x        |          |
| <b>Bind_2499</b> | <b>transcriptional regulator, LysR family</b>                                                      | <b>K</b>        | <b>x</b> |          |
| Bind_2500        | major facilitator superfamily MFS_1                                                                | -               | x        |          |
| Bind_2501        | secretion protein HlyD family protein                                                              | V               | x        |          |
| Bind_2502        | RND efflux system, outer membrane lipoprotein, NodT family                                         | M, U            | x        |          |
| <b>Bind_2503</b> | <b>transcriptional regulator, PadR-like family</b>                                                 | <b>K</b>        | <b>x</b> |          |
| Bind_2505        | short-chain dehydrogenase/reductase SDR                                                            | R (-)           | x        |          |
| Bind_2506        | ThiJ/Pfpl domain protein                                                                           | R (-)           | x        |          |
| <b>Bind_2507</b> | <b>transcriptional regulator, LuxR family</b>                                                      | <b>K</b>        | <b>x</b> | <b>x</b> |
| Bind_2508        | short-chain dehydrogenase of various substrate specificities                                       | R (Q)           | x        | x        |
| <b>Bind_2510</b> | <b>Na/Picotransporter</b>                                                                          | <b>P</b>        |          | <b>x</b> |
| Bind_2512        | hypothetical protein                                                                               | S               | x        | x        |
| Bind_2513        | hypothetical protein                                                                               | -               | x        | x        |
| Bind_2514        | putative transcriptional regulator                                                                 | -               | x        | x        |
| <b>Bind_2516</b> | <b>NAD-dependent epimerase/dehydratase</b>                                                         | <b>G</b>        | <b>x</b> | <b>x</b> |
| <b>Bind_2519</b> | <b>ABC transporter related</b>                                                                     | <b>G</b>        | <b>x</b> | <b>x</b> |
| <b>Bind_2520</b> | <b>binding-protein-dependent transport systems inner membrane component</b>                        | <b>P</b>        | <b>x</b> | <b>x</b> |
| <b>Bind_2521</b> | <b>extracellular solute-binding protein family</b>                                                 | <b>P</b>        | <b>x</b> | <b>x</b> |

|                  |                                                                    |              |          |          |
|------------------|--------------------------------------------------------------------|--------------|----------|----------|
| Bind_2522        | hypothetical protein                                               | -            | x        | x        |
| <b>Bind_2523</b> | <b>chromate transporter, chromate ion transporter (CHR) family</b> | <b>P</b>     |          | <b>x</b> |
| Bind_2530        | amino acid permease-associated region                              | E            | x        | x        |
| Bind_2531        | Siderophore synthetase component-like protein                      | Q            |          | x        |
| Bind_2532        | putative nickel ABC transporter, permease protein                  | R (-)        |          | x        |
| <b>Bind_2533</b> | <b>MaoC domain protein dehydratase</b>                             | <b>I</b>     | <b>x</b> | <b>x</b> |
| <b>Bind_2534</b> | <b>Citryl-CoA lyase</b>                                            | <b>G</b>     | <b>x</b> | <b>x</b> |
| <b>Bind_2535</b> | <b>major facilitator superfamily MFS_1</b>                         | <b>G</b>     | <b>x</b> | <b>x</b> |
| Bind_2536        | L-carnitine dehydratase/bile acid-inducible protein F              | F            |          | x        |
| <b>Bind_2537</b> | <b>transcriptional regulator, LysR family</b>                      | <b>K</b>     |          | <b>x</b> |
| Bind_2538        | prevent-host-death family protein                                  | -            |          | x        |
| Bind_2539        | PilT protein domain protein                                        | R (-)        |          | x        |
| <b>Bind_2540</b> | <b>transcriptional regulator</b>                                   | <b>K</b>     |          | <b>x</b> |
| <b>Bind_2541</b> | <b>Malate/L-lactate dehydrogenase</b>                              | <b>C</b>     | <b>x</b> | <b>x</b> |
| <b>Bind_2542</b> | <b>major facilitator superfamily MFS_1</b>                         | <b>G</b>     |          | <b>x</b> |
| <b>Bind_2543</b> | <b>3-carboxymuconate cyclase-like protein</b>                      | <b>G</b>     | <b>x</b> | <b>x</b> |
| Bind_2544        | porin                                                              | -            |          | x        |
| <b>Bind_2545</b> | <b>isocitrate dehydrogenase, NADP-dependent</b>                    | <b>R (C)</b> |          | <b>x</b> |
| Bind_2546        | extracellular solute-binding protein family                        | E            |          | x        |
| <b>Bind_2573</b> | <b>cytochrome-c peroxidase</b>                                     | <b>P</b>     | <b>x</b> | <b>x</b> |
| <b>Bind_2576</b> | <b>major facilitator superfamily MFS_1</b>                         | <b>P</b>     | <b>x</b> | <b>x</b> |
| Bind_2577        | hypothetical protein                                               | -            | x        | x        |
| Bind_2578        | hypothetical protein                                               | -            | x        | x        |
| Bind_2579        | metal-dependent hydrolase                                          | -            | x        | x        |
| <b>Bind_2580</b> | <b>regulatory protein MerR</b>                                     | <b>C</b>     | <b>x</b> | <b>x</b> |
| Bind_2582        | protein of unknown function                                        | -            | x        | x        |
| Bind_2583        | putative insertion sequence                                        | L            |          | x        |
| Bind_2584        | hypothetical protein                                               | -            | x        | x        |
| Bind_2585        | short-chain dehydrogenase/reductase                                | R (Q)        |          | x        |
| Bind_2586        | heme oxygenase family                                              | H            |          | x        |
| Bind_2587        | AMP-dependent synthetase and ligase                                | I            |          | x        |
| Bind_2588        | hypothetical protein                                               | -            |          | x        |
| <b>Bind_2589</b> | <b>two component transcriptional regulator</b>                     | <b>K</b>     | <b>x</b> | <b>x</b> |
| <b>Bind_2590</b> | <b>integral membrane sensor signal</b>                             | <b>T</b>     | <b>x</b> | <b>x</b> |
| Bind_2591        | hypothetical protein                                               | -            |          | x        |
| <b>Bind_2594</b> | <b>VacJ family lipoprotein</b>                                     | <b>M</b>     | <b>x</b> | <b>x</b> |
| Bind_2595        | hypothetical protein                                               | S            |          | x        |
| Bind_2596        | tetratricopeptide TPR_2 repeat protein                             | N            |          | x        |
| Bind_2597        | Methyltransferase type 11                                          | H            |          | x        |
| Bind_2598        | hypothetical protein                                               | -            |          | x        |
| Bind_2599        | hypothetical protein                                               | S            | x        | x        |
| Bind_2600        | tetratricopeptide TPR_2 repeat protein                             | N            |          | x        |
| Bind_2601        | aminotransferase class-III                                         | E            | x        | x        |
| Bind_2602        | 3-Oxoacyl-(acyl-carrier-protein (ACP))                             | Q            | x        | x        |
| <b>Bind_2603</b> | <b>monooxygenase FAD-binding</b>                                   | <b>C</b>     | <b>x</b> | <b>x</b> |
| Bind_2604        | Transposase and inactivated derivatives-like protein               | L            |          | x        |
| Bind_2606        | hypothetical protein                                               | -            | x        | x        |
| Bind_2607        | hypothetical protein                                               | -            |          | x        |
| <b>Bind_2609</b> | <b>transcriptional regulator, AraC family</b>                      | <b>K</b>     | <b>x</b> | <b>x</b> |
| <b>Bind_2611</b> | <b>transcriptional regulator, AraC family</b>                      | <b>K</b>     | <b>x</b> | <b>x</b> |
| <b>Bind_2612</b> | <b>aldo/keto reductase</b>                                         | <b>C</b>     | <b>x</b> | <b>x</b> |
| <b>Bind_2613</b> | <b>NAD-dependent epimerase/dehydratase</b>                         | <b>G</b>     | <b>x</b> | <b>x</b> |
| <b>Bind_2614</b> | <b>NAD-dependent epimerase/dehydratase</b>                         | <b>G</b>     | <b>x</b> | <b>x</b> |
| Bind_2615        | X-Pro dipeptidyl-peptidase domain protein                          | R (-)        | x        | x        |
| Bind_2619        | Transposase and inactivated derivatives-like protein               | L            |          | x        |
| <b>Bind_2620</b> | <b>transcriptional regulator, AraC family</b>                      | <b>K</b>     | <b>x</b> | <b>x</b> |
| <b>Bind_2622</b> | <b>FMN-dependent alpha-hydroxy acid dehydrogenase</b>              | <b>C</b>     |          | <b>x</b> |
| Bind_2623        | ThiJ/Pfpl domain protein                                           | R (V, R)     | x        | x        |
| <b>Bind_2624</b> | <b>Alkanesulfonate monooxygenase</b>                               | <b>C</b>     |          | <b>x</b> |

|                  |                                                                         |                 |          |          |
|------------------|-------------------------------------------------------------------------|-----------------|----------|----------|
| <b>Bind_2625</b> | <b>flavin reductase domain protein FMN-binding</b>                      | <b>R, C</b>     | <b>x</b> | <b>x</b> |
| Bind_2626        | 5-carboxymethyl-2-hydroxymuconate Delta-isomerase                       | Q               | x        | x        |
| Bind_2627        | 3,4-dihydroxy-2-butanone 4-phosphate synthase                           | H               | x        | x        |
| Bind_2628        | extracellular ligand-binding receptor                                   | E               | x        | x        |
| Bind_2629        | hypothetical protein                                                    | -               | x        | x        |
| <b>Bind_2633</b> | <b>Alcohol dehydrogenase zinc-binding domain protein</b>                | <b>C</b>        | <b>x</b> | <b>x</b> |
| <b>Bind_2634</b> | <b>major facilitator superfamily MFS_1</b>                              | <b>-(G)</b>     | <b>x</b> | <b>x</b> |
| <b>Bind_2635</b> | <b>transcriptional regulator, LysR family</b>                           | <b>K</b>        | <b>x</b> | <b>x</b> |
| Bind_2637        | peptidase M10A and M12B matrixin and adamalysin                         | -(O, W)         | x        | x        |
| <b>Bind_2639</b> | <b>nucleotide sugar dehydrogenase</b>                                   | <b>M</b>        | <b>x</b> | <b>x</b> |
| Bind_2640        | transcriptional regulator, ModE family                                  | R (-)           | x        | x        |
| Bind_2641        | hypothetical protein                                                    | -               | x        | x        |
| <b>Bind_2642</b> | <b>mannose-1-phosphate</b>                                              | <b>M</b>        | <b>x</b> | <b>x</b> |
| <b>Bind_2643</b> | <b>Endo-1,4-beta-xylanase</b>                                           | <b>G</b>        | <b>x</b> | <b>x</b> |
| <b>Bind_2644</b> | <b>capsular exopolysaccharide family</b>                                | <b>M</b>        | <b>x</b> | <b>x</b> |
| <b>Bind_2645</b> | <b>glycosyl transferase group 1</b>                                     | <b>M</b>        | <b>x</b> | <b>x</b> |
| Bind_2647        | hypothetical protein                                                    | -               | x        | x        |
| <b>Bind_2648</b> | <b>glycosyl transferase, WecB/TagA/CpsF family</b>                      | <b>M</b>        | <b>x</b> | <b>x</b> |
| <b>Bind_2650</b> | <b>glycosyl transferase group 1</b>                                     | <b>M</b>        | <b>x</b> | <b>x</b> |
| Bind_2651        | acyltransferase 3                                                       | I               | x        | x        |
| Bind_2653        | polysaccharide biosynthesis protein                                     | R (-)           | x        | x        |
| <b>Bind_2655</b> | <b>acyltransferase 3</b>                                                | <b>G</b>        | <b>x</b> | <b>x</b> |
| <b>Bind_2656</b> | <b>NAD-dependent epimerase/dehydratase</b>                              | <b>G</b>        | <b>x</b> | <b>x</b> |
| Bind_2657        | hypothetical protein                                                    | -               | x        | x        |
| Bind_2658        | hypothetical protein                                                    | -               | x        | x        |
| Bind_2661        | hypothetical protein                                                    | -               | x        | x        |
| Bind_2665        | integrase family protein                                                | L               | x        | x        |
| Bind_2666        | YcfA family protein                                                     | N               | x        | x        |
| Bind_2667        | protein of unknown function                                             | S               | x        | x        |
| Bind_2756        | Galactose oxidase                                                       | -               | x        | x        |
| <b>Bind_2757</b> | <b>glycosyl transferase group 1</b>                                     | <b>M</b>        |          | <b>x</b> |
| Bind_2758        | hypothetical protein                                                    | -               |          | x        |
| <b>Bind_2759</b> | <b>glycoside hydrolase family 5</b>                                     | <b>G</b>        | <b>x</b> | <b>x</b> |
| Bind_2760        | hypothetical protein                                                    | -               | x        | x        |
| Bind_2761        | hypothetical protein                                                    | -               |          | x        |
| <b>Bind_2762</b> | <b>lipopolysaccharide biosynthesis protein</b>                          | <b>M</b>        |          | <b>x</b> |
| Bind_2763        | hypothetical protein                                                    | -               | x        | x        |
| Bind_2764        | hypothetical protein                                                    | R               |          | x        |
| Bind_2775        | putative H(+)-transporting ATP synthase, gene 1 protein                 | -               | x        |          |
| <b>Bind_2776</b> | <b>ATP synthase F0, A subunit( EC:3.6.3.14 )</b>                        | <b>C</b>        | <b>x</b> |          |
| <b>Bind_2777</b> | <b>ATP synthase F0, C subunit( EC:3.6.3.14 )</b>                        | <b>C</b>        | <b>x</b> |          |
| <b>Bind_2827</b> | <b>oxidoreductase domain protein</b>                                    | <b>R (G, Q)</b> | <b>x</b> |          |
| <b>Bind_2828</b> | <b>Inositol 2-dehydrogenase( EC:1.1.1.18 )</b>                          | <b>R (G, Q)</b> | <b>x</b> |          |
| Bind_2829        | D-isomer specific 2-hydroxyacid dehydrogenase NAD-binding (EC:1.1.1.95) | E, H            | x        |          |
| <b>Bind_2830</b> | <b>HpcH/Hpal aldolase( EC:4.1.2.- )</b>                                 | <b>G</b>        | <b>x</b> |          |
| <b>Bind_2831</b> | <b>Aldehyde Dehydrogenase( EC:1.2.1.16 )</b>                            | <b>C</b>        | <b>x</b> |          |
| Bind_2832        |                                                                         |                 |          |          |
| <b>Bind_2833</b> | <b>transcriptional regulator, RpiR family</b>                           | <b>K</b>        | <b>x</b> |          |
| Bind_2834        | thiamine pyrophosphate protein central region (EC:3.7.1.-)              | E               | x        |          |
| <b>Bind_2835</b> | <b>Xylose isomerase domain protein TIM barrel ( EC:4.2.1.44)</b>        | <b>G</b>        | <b>x</b> |          |
| <b>Bind_2961</b> | <b>Alcohol dehydrogenase GroES domain protein</b>                       | <b>C</b>        | <b>x</b> |          |
| <b>Bind_2962</b> | <b>transcriptional regulator, LysR family</b>                           | <b>K</b>        | <b>x</b> |          |
| <b>Bind_2963</b> | <b>aldo/keto reductase</b>                                              | <b>C</b>        | <b>x</b> | <b>x</b> |
| Bind_2964        | beta-lactamase domain protein                                           | R               | x        | x        |
| Bind_2965        | hypothetical protein                                                    | -               |          | x        |
| Bind_2966        | hypothetical protein                                                    | -               |          | x        |

|                  |                                                                              |             |          |          |
|------------------|------------------------------------------------------------------------------|-------------|----------|----------|
| <b>Bind_2967</b> | <b>transcriptional regulator, LysR family</b>                                | <b>K</b>    |          | <b>x</b> |
| <b>Bind_2973</b> | <b>transcriptional regulator, LuxR family</b>                                | <b>K</b>    | <b>x</b> | <b>x</b> |
| Bind_2974        | autoinducer synthesis protein                                                | Q           | x        | x        |
| Bind_2975        | Phytanoyl-CoA dioxygenase                                                    | Q           | x        | x        |
| <b>Bind_2976</b> | <b>transcriptional regulator, LuxR family</b>                                | <b>K</b>    | <b>x</b> | <b>x</b> |
| Bind_2977        | 2OG-Fe(II) oxygenase                                                         | R (Q, R)    | x        | x        |
| Bind_2979        | hypothetical protein                                                         | E           | x        | x        |
| <b>Bind_2980</b> | <b>transcriptional regulator, LysR family</b>                                | <b>K</b>    | <b>x</b> | <b>x</b> |
| <b>Bind_2981</b> | <b>transcriptional regulator, TetR family</b>                                | <b>K</b>    | <b>x</b> | <b>x</b> |
| Bind_2982        | hypothetical protein                                                         | -           |          | x        |
| Bind_2983        | hypothetical protein                                                         | -           |          | x        |
| Bind_2984        | protein of unknown function                                                  | S           |          | x        |
| Bind_2985        | hypothetical protein                                                         | -           |          | x        |
| Bind_2986        | isochorismatase hydrolase                                                    | Q           |          | x        |
| <b>Bind_2987</b> | <b>inorganic pyrophosphatase</b>                                             | <b>C</b>    |          | <b>x</b> |
| Bind_2989        | alpha/beta hydrolase fold                                                    | R (R)       | x        | x        |
| Bind_2990        | short-chain dehydrogenase/reductase SDR                                      | R (Q)       |          | x        |
| Bind_2991        | hypothetical protein                                                         | -           |          | x        |
| Bind_2992        | short-chain dehydrogenase/reductase SDR                                      | I           |          | x        |
| Bind_2993        | hypothetical protein                                                         | -           | x        | x        |
| Bind_2994        | hypothetical protein                                                         | -           | x        | x        |
| Bind_2995        | protein of unknown function                                                  | R (-)       |          | x        |
| Bind_2996        | hypothetical protein                                                         | -           |          | x        |
| <b>Bind_2997</b> | <b>integral membrane sensor signal transduction histidine kinase</b>         | <b>T</b>    |          | <b>x</b> |
| <b>Bind_2998</b> | <b>two component, sigma54 specific,transcriptional regulator, Fis family</b> | <b>T</b>    |          | <b>x</b> |
| Bind_3000        | hypothetical protein                                                         | -           |          | x        |
| Bind_3001        | hypothetical protein                                                         | -           |          | x        |
| <b>Bind_3002</b> | <b>Arsenical pump membrane protein</b>                                       | <b>P</b>    |          | <b>x</b> |
| <b>Bind_3003</b> | <b>hypothetical protein</b>                                                  | <b>S</b>    | <b>x</b> | <b>x</b> |
| <b>Bind_3004</b> | <b>major facilitator superfamily MFS_1</b>                                   | <b>G</b>    |          | <b>x</b> |
| <b>Bind_3078</b> | <b>Aldehyde Dehydrogenase</b>                                                | <b>C</b>    |          | <b>x</b> |
| <b>Bind_3079</b> | <b>major facilitator superfamily MFS_1</b>                                   | <b>G</b>    | <b>x</b> | <b>x</b> |
| <b>Bind_3080</b> | <b>dihydrodipicolinate synthetase</b>                                        | <b>M, E</b> |          | <b>x</b> |
| <b>Bind_3081</b> | <b>Dihydroxy-acid dehydratase</b>                                            | <b>G, E</b> |          | <b>x</b> |
| Bind_3388        | hypothetical protein                                                         | -           | x        |          |
| <b>Bind_3389</b> | <b>thiamine pyrophosphate protein TPP binding domain protein</b>             | <b>G</b>    | <b>x</b> |          |
| <b>Bind_3390</b> | <b>major facilitator superfamily MFS_1</b>                                   | <b>G</b>    | <b>x</b> |          |
| <b>Bind_3431</b> | <b>Glucan 1,4-alpha-glucosidase</b>                                          | <b>G</b>    | <b>x</b> |          |
| Bind_3432        | FMN-binding domain protein                                                   | -           | x        | x        |
| Bind_3433        | ApbE family lipoprotein                                                      | H           | x        | x        |
| Bind_3434        | putative transmembrane protein                                               | -           | x        | x        |
| Bind_3435        | conserved hypothetical secreted protein                                      | -           | x        | x        |

**Supplementary Figure 1** Synteny dot plots of *M. silvestris* versus *M. acidiphila* and *M. silvestris* versus *B. indica* generated using the Promer program in IMG.

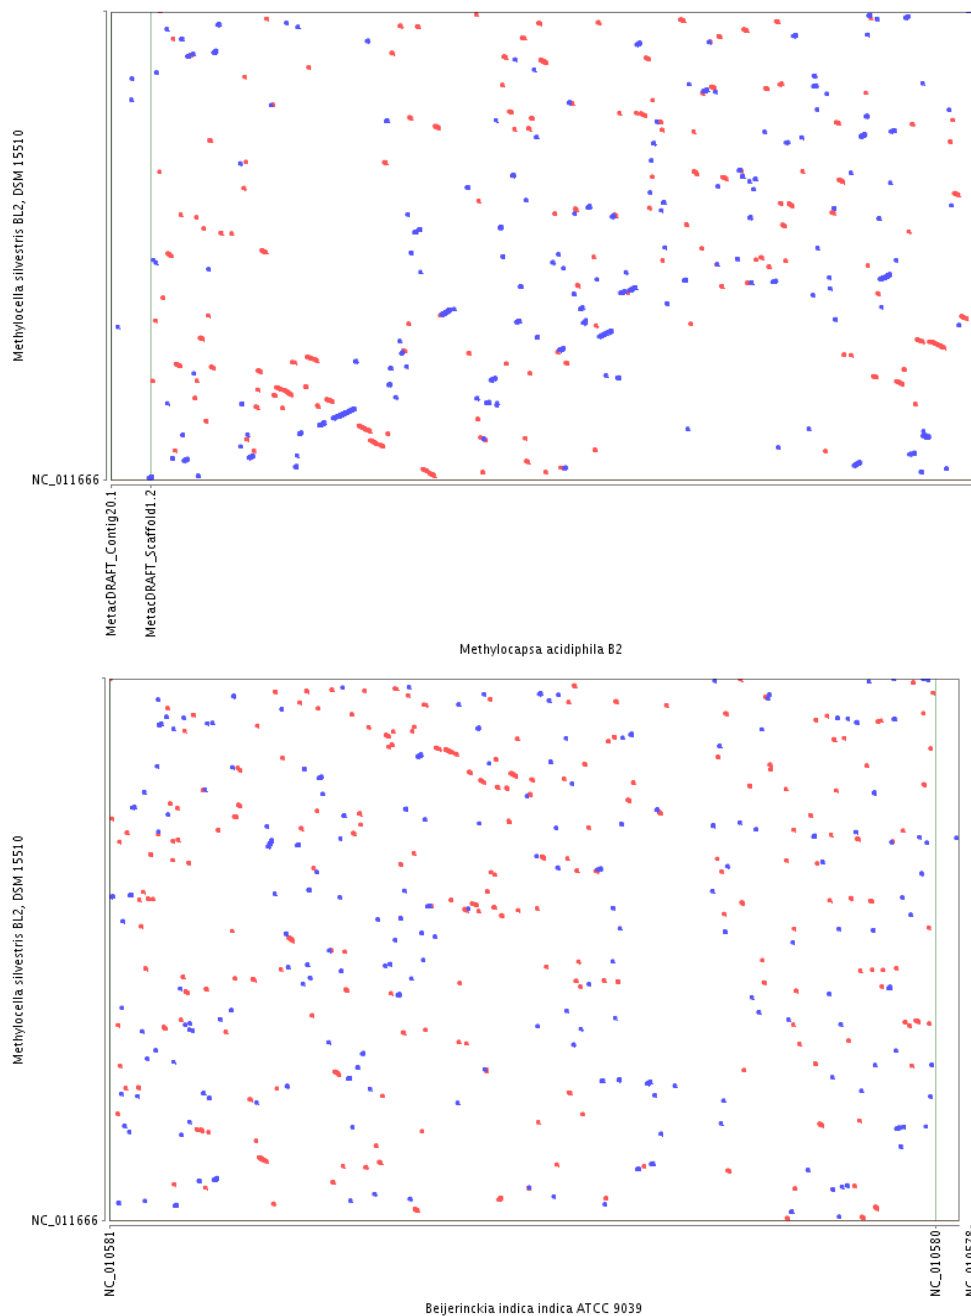

**Supplementary Figure 2** Unrooted 16S rRNA gene-based tree showing the relationships of *Beijerinckiaceae* and *Methylocystaceae* to other *Rhizobiales*. The tree was constructed in the ARB platform from nearly full length sequences (>1400 nt) via Neighbour-joining with a Jukes-Cantor correction (Ludwig *et al.*, 2004). A consensus tree of 1000 bootstrap replicates is shown, only bootstrap values greater than 50% are indicated. The scale bar represents 0.1 change per nucleotide site. Species that have been incorrectly classified as members of the *Beijerinckiaceae* or *Methylocystaceae* are shown in pink. Sequence alignments were taken from the ARB-Silva reference database Version 111 (Quast *et al* 2013).

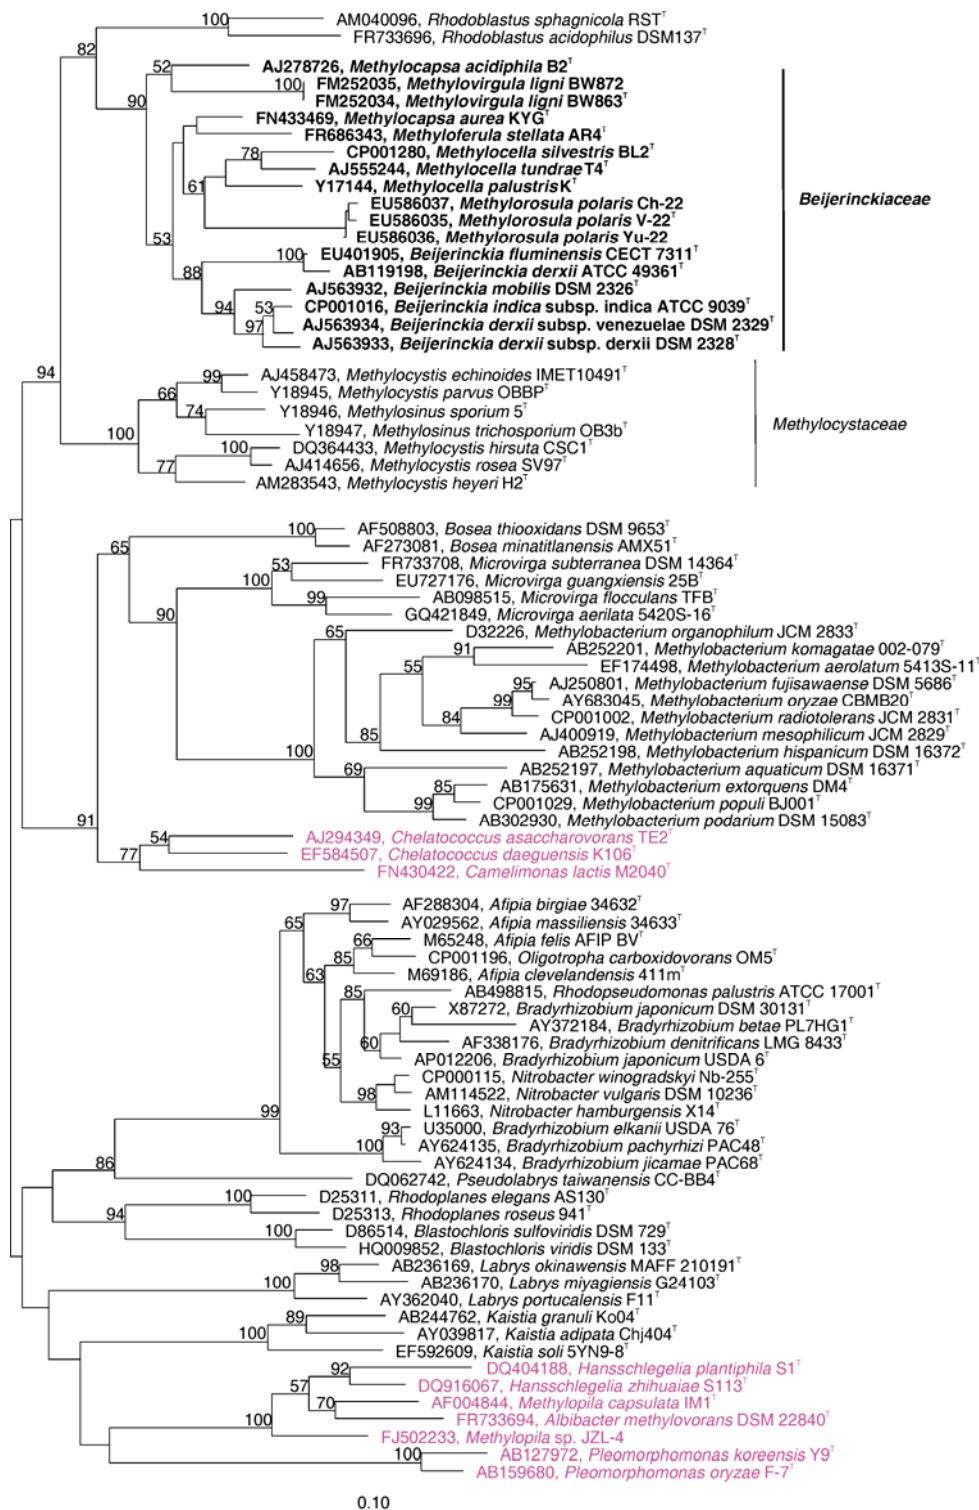

**Supplementary Figure 3** Phylogenetic tree showing the relationship of derived MmoX proteins, the hydroxylase component of sMMO. The tree was constructed using Neighbour-Joining and a Kimura distance correction, based on 390 amino acids total length. The scale bar represents 0.05 changes per amino acid position. Bootstrap values of 1000 constructions are shown at the nodes when greater than 50%. Gene accession numbers are given in parentheses.

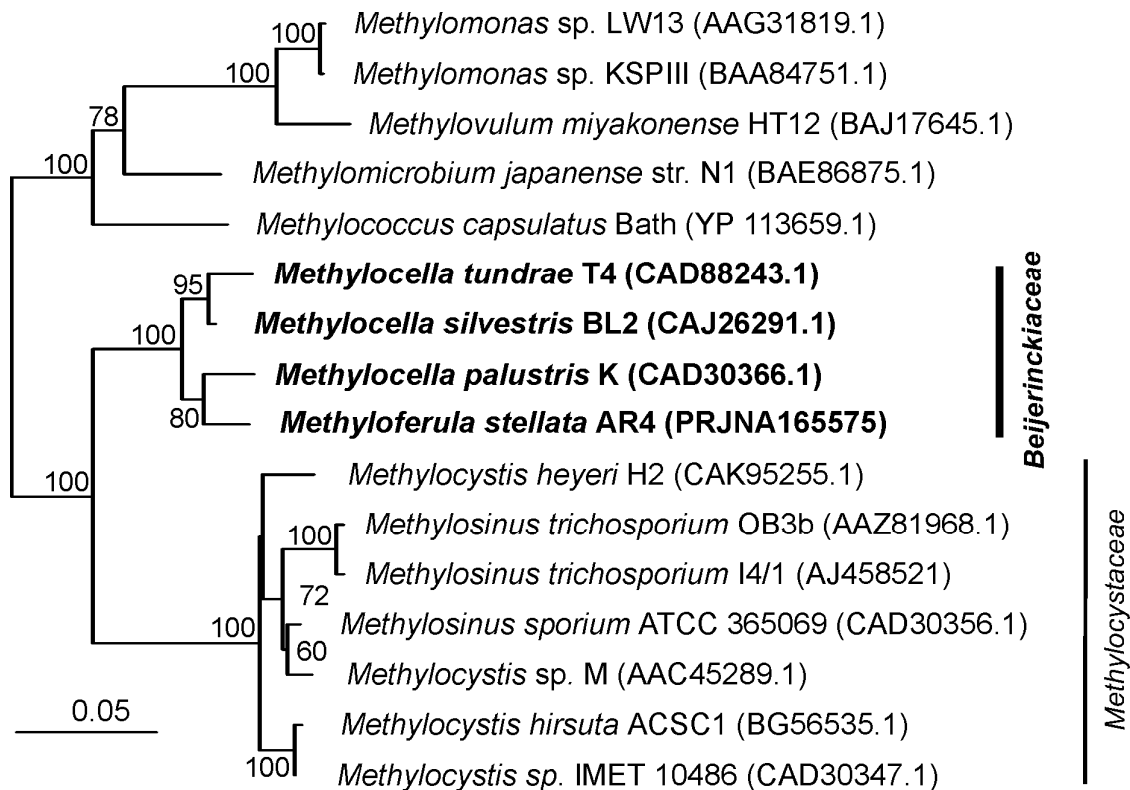



**Supplementary Figure 4** Phylogenetic tree showing the relationship of concatenated derived MxaFJI proteins. The tree was constructed using Neighbour-Joining and a Kimura distance correction, based on 851 amino acids total length. The scale bar represents 0.05 changes per amino acid position. Bootstraps values of 1000 constructions are shown at the nodes. Genome accession numbers are given in parentheses.

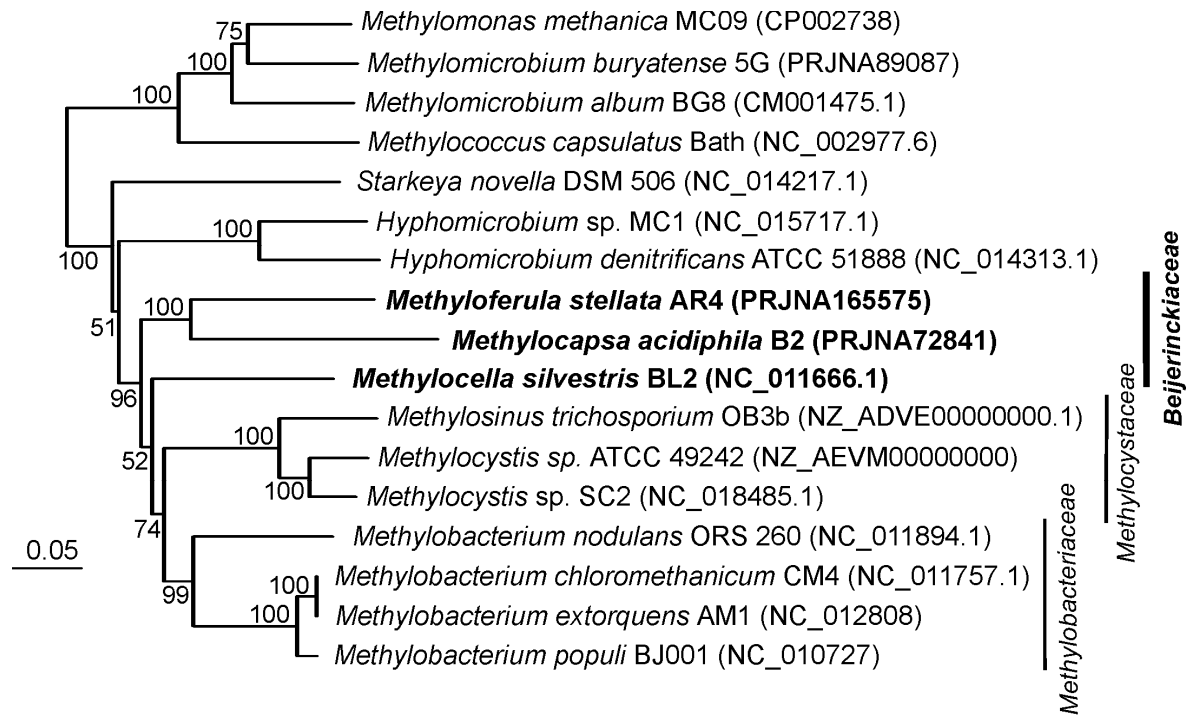

**Supplementary Figure 5** Phylogenetic tree showing the relationship of concatenated derived products of *nifH* and *nifD*. The tree was constructed using Neighbour-Joining and a Kimura distance correction, based on a concatenation of 290 amino acids total length. The scale bar represents 0.02 changes per amino acid position. Bootstraps values of 1000 constructions are shown at the nodes. Genome accession numbers are given in parentheses.

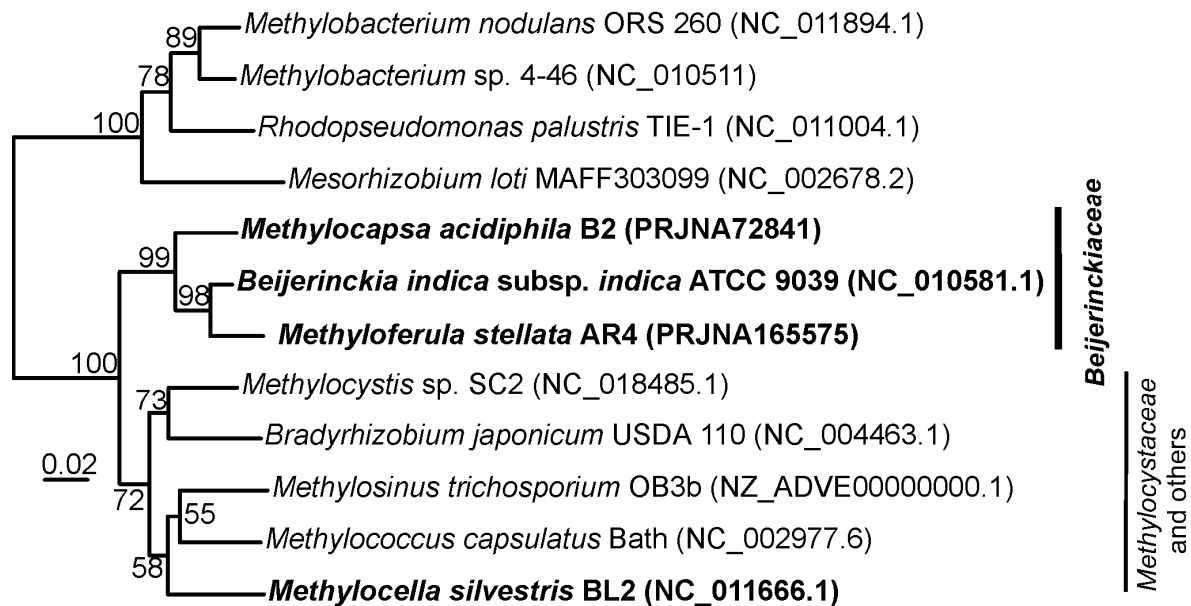

**Supplementary Figure 6** Phylogenetic tree of derived proteins from genes identified as periplasmic binding protein/LacI transcriptional regulators. Proteins derived from the *B. indica* genome (in bold) are compared to the closest public-domain sequences identified via BLAST. The tree was constructed using Neighbour-Joining and a Kimura distance correction, based on 538 amino acids. The scale bar represents 0.1 changes per amino acid position. Bootstraps values of 1000 constructions are shown at the nodes when >50%.

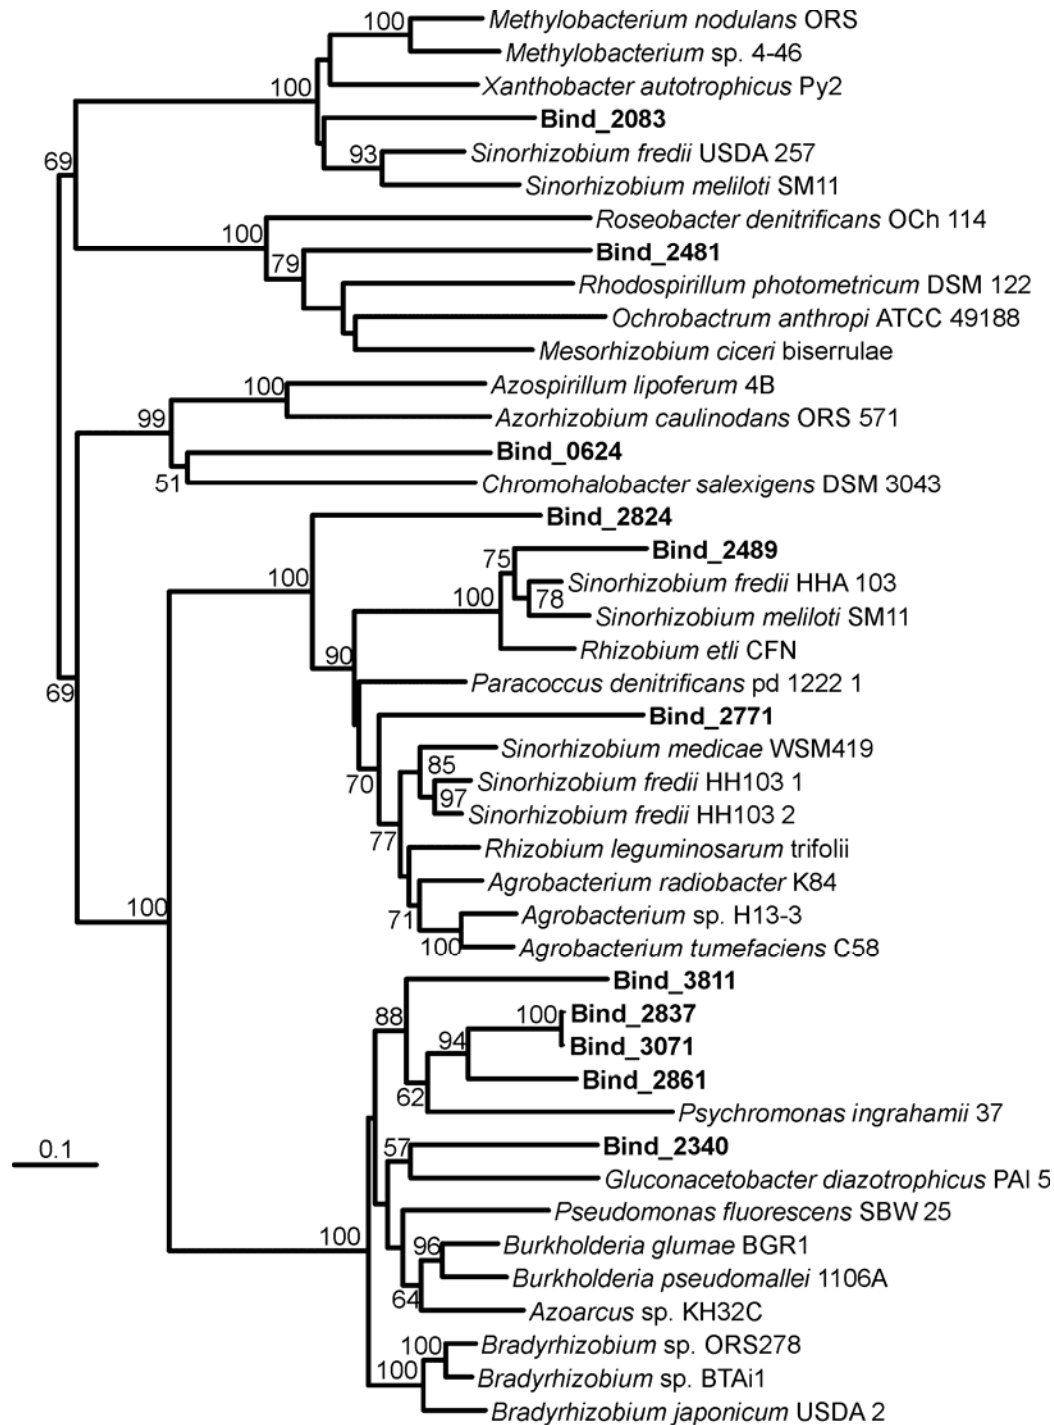

**Supplementary Figure 7** Methylo-trophy islands and potential LGT islands in the three genomes. Methylo-trophy genes as described in Supplementary Table 3 are indicated on the outer rings. On the inner rings GC content is shown and shaded areas represent islands identified by IslandViewer or AlienHunter. The figure was drawn using Ring Image Generator (Alikhan *et al.*, 2011). Methylo-trophy genes were identified by BLAST, therefore they do not necessarily represent genes for methylo-trophy functions, only homologues of these.

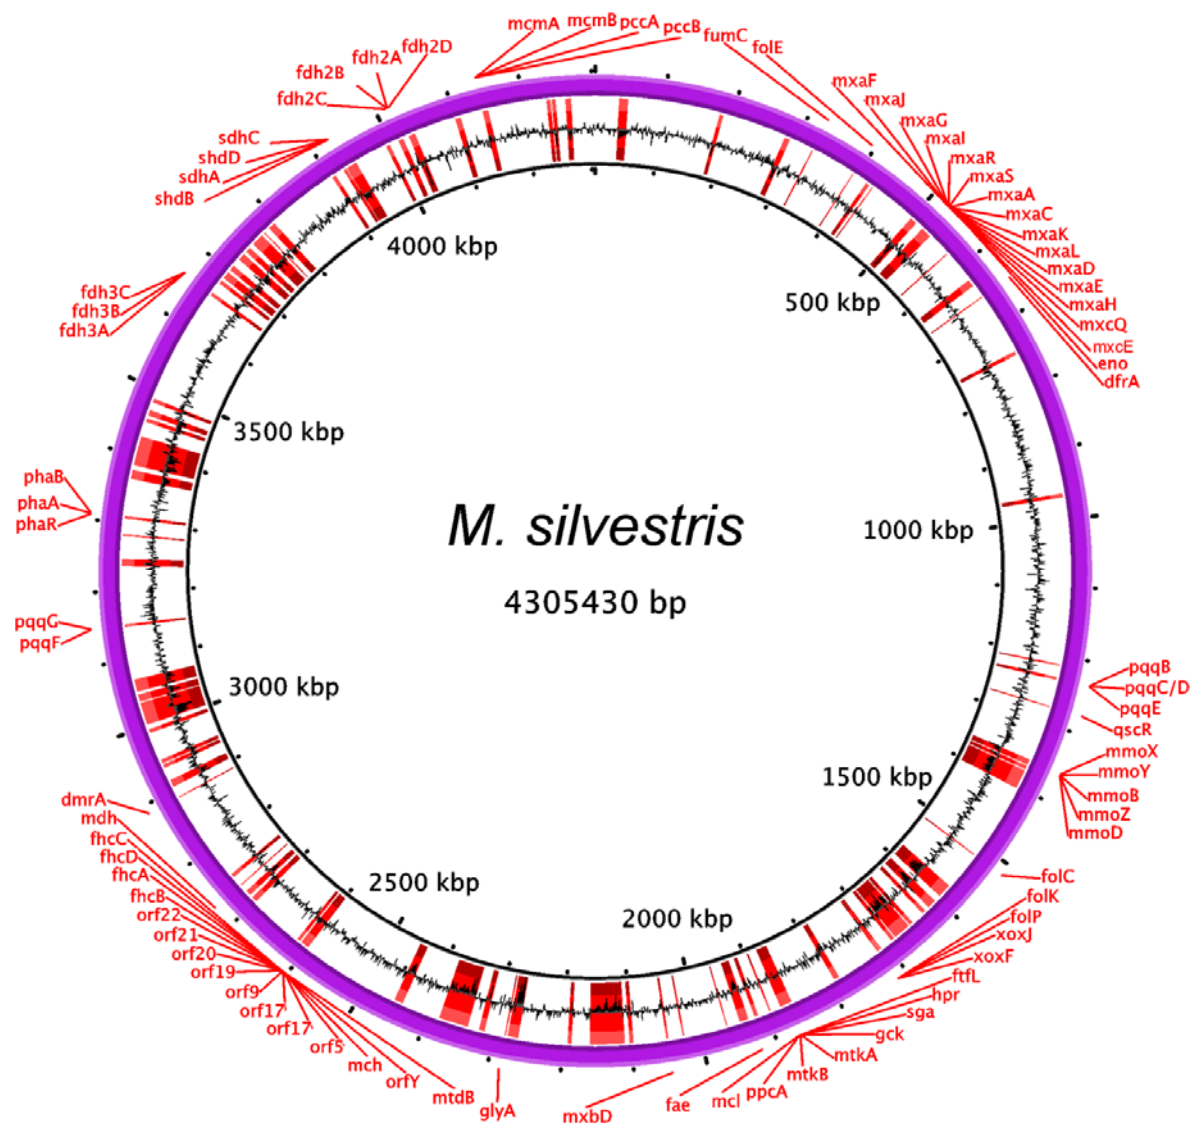



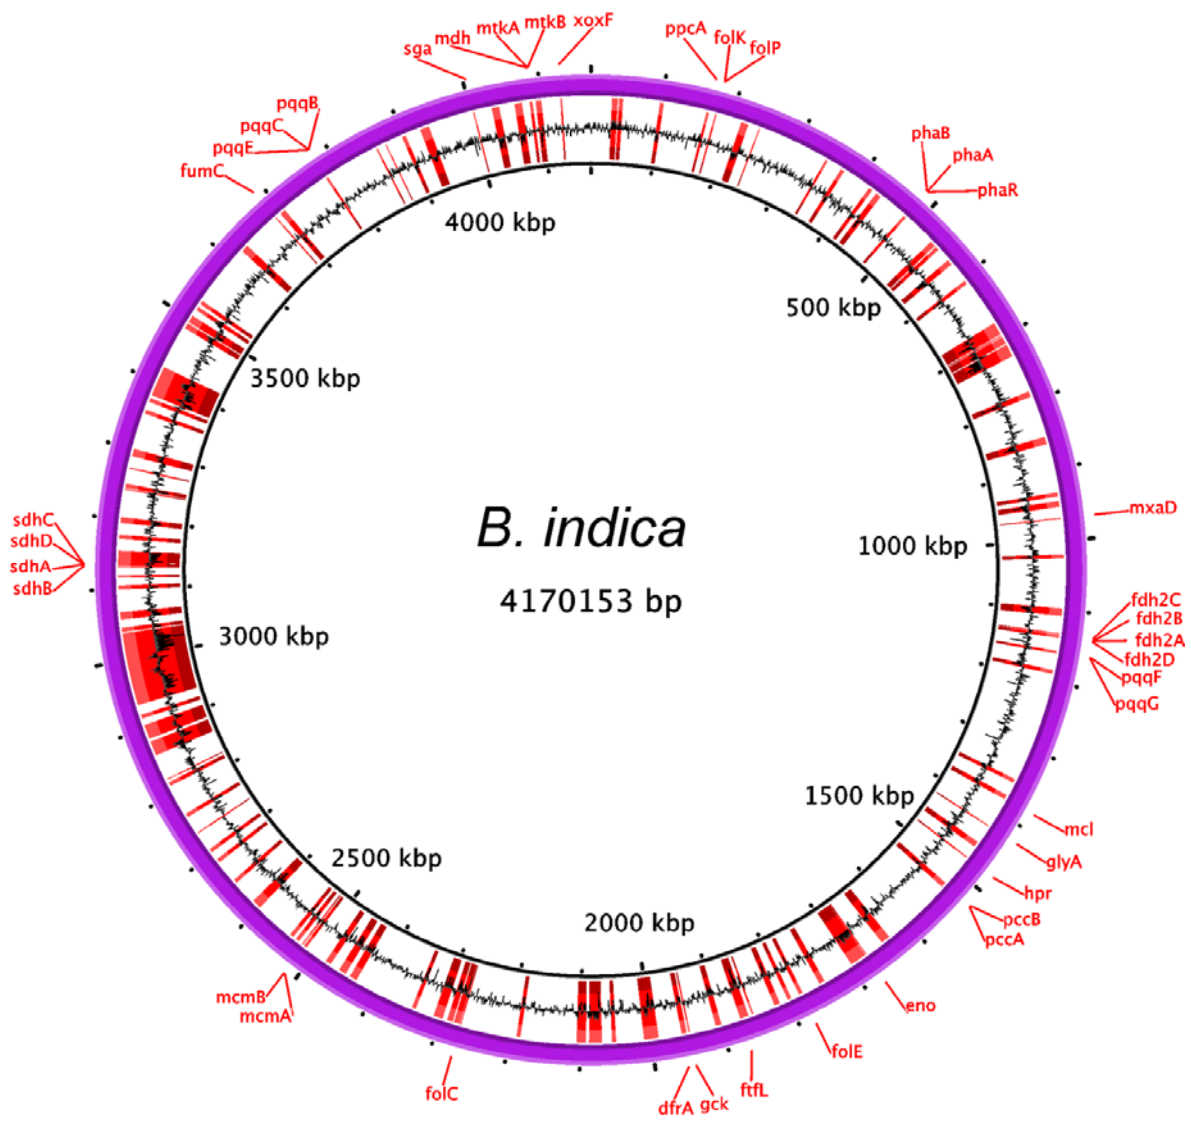

**Supplementary Figure 8** Clustering of some genes involved in the serine cycle of C1 assimilation in some *Alphaproteobacteria*. Clustered genes directly involved in the serine cycle (orange color) are *sga*, serine cycle glyoxylate aminotransferase; *hpr*, hydroxypyruvate reductase; *mtkA*, malate thiokinase,  $\beta$  large subunit; *mtkB*, malate thiokinase,  $\alpha$  small subunit; *ppc*, phosphoenolpyruvate carboxylase; *mcl*, malyl-CoA lyase; *gck*, glycerate kinase. Clustered genes involved indirectly in the serine cycle by activating formate (blue color) are *mtdA*, methylene- $H_4$ MPT/methylene- $H_4$ F dehydrogenase; *fch*, methenyl- $H_4$ F cyclohydrolase; *ftL*, formyl- $H_4$ F ligase. Genes indicated by gray are not known to be related to the serine cycle.

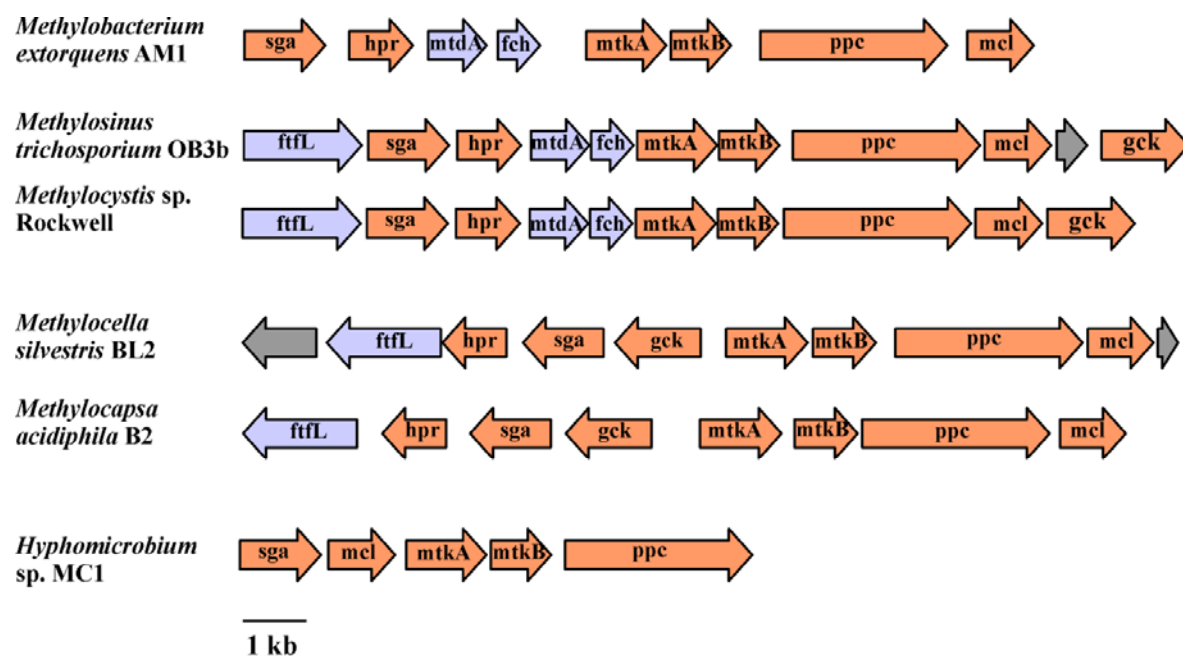

Supplement: ismej2013145x1.pdf [file ismej2013145x1.pdf]
